# Supplementary material for: Visualizing endogenous opioid receptors in living neurons using ligand-directed chemistry
Source: eLife journal article supplement (doi:10.7554/elife.49319), 2019-10-07

A) Fluorescence spectra of solubilized-receptors labeled with NAI-A594

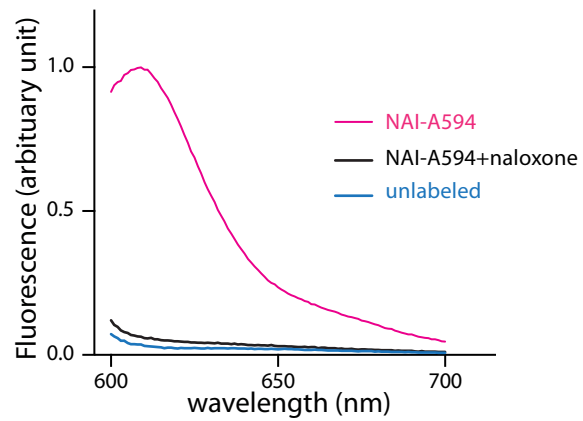

B) Time course of NAI-A488 labeling

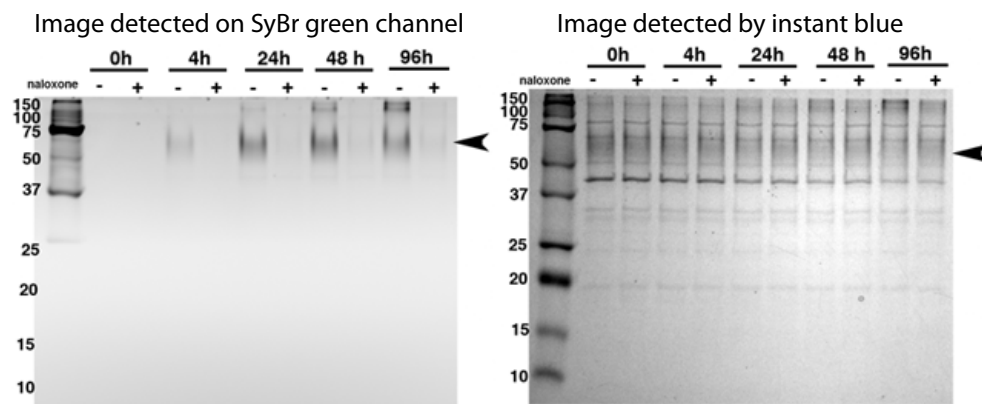

Supplement: supp [file elife-49319-supp-v1.zip]
