# Supplementary material for: Visualizing endogenous opioid receptors in living neurons using ligand-directed chemistry
Source: eLife journal article supplement (doi:10.7554/elife.49319), 2019-10-07
Supplement: supp [file elife-49319-supp-v1.zip]

Archive with 12 entries (12 files):
- elife_poa_e49319_Figure_4_figure_supplement_1.pdf
- elife_poa_e49319_Video_3.mov
- elife_poa_e49319_Video_4.mov
- elife_poa_e49319_Figure_3_figure_supplement_1.pdf
- elife_poa_e49319_Transparent_Reporting_File.pdf
- elife_poa_e49319_Figure_2_figure_supplement_2.pdf
- elife_poa_e49319_Figure_3_figure_supplement_2.pdf
- elife_poa_e49319_Video_1.mov
- elife_poa_e49319_Video_2.mov
- elife_poa_e49319_Figure_2_figure_supplement_1.pdf
- elife_poa_e49319_Figure_7_figure_supplement_1.pdf
- elife_poa_e49319_Figure_1_figure_supplement1.pdf
