# Supplementary material for: Visualizing endogenous opioid receptors in living neurons using ligand-directed chemistry
Source: eLife journal article supplement (doi:10.7554/elife.49319), 2019-10-07

# NAI-A594 labeled opioid receptors in HEK293 cells

a) FlagMOR

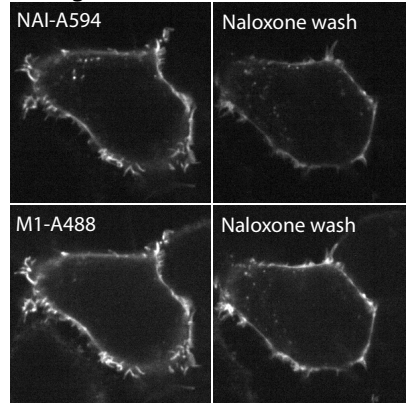

b) FlagDOR

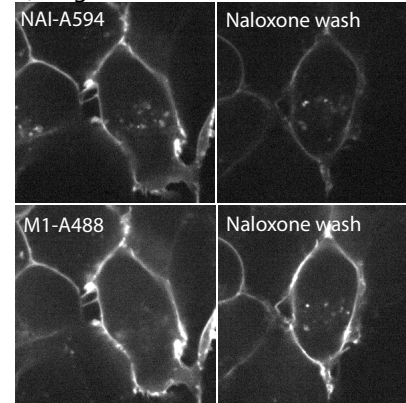

c) FlagKOR

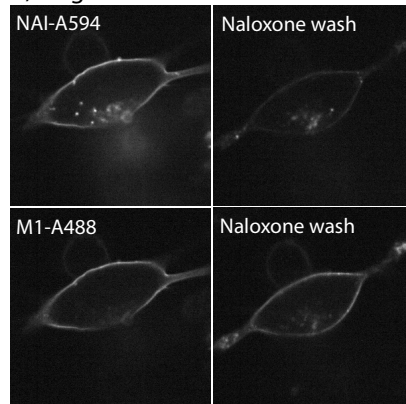

d) Fluorescence after naloxone wash

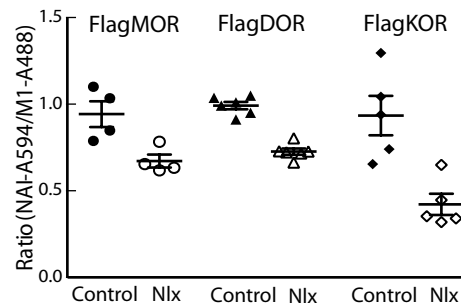

Supplement: supp [file elife-49319-supp-v1.zip › elife_poa_e49319_Figure_2_figure_supplement_1.pdf]
