# Supplementary material for: Visualizing endogenous opioid receptors in living neurons using ligand-directed chemistry
Source: eLife journal article supplement (doi:10.7554/elife.49319), 2019-10-07

A) Fluorescence of Alexa594 decreased after drug application

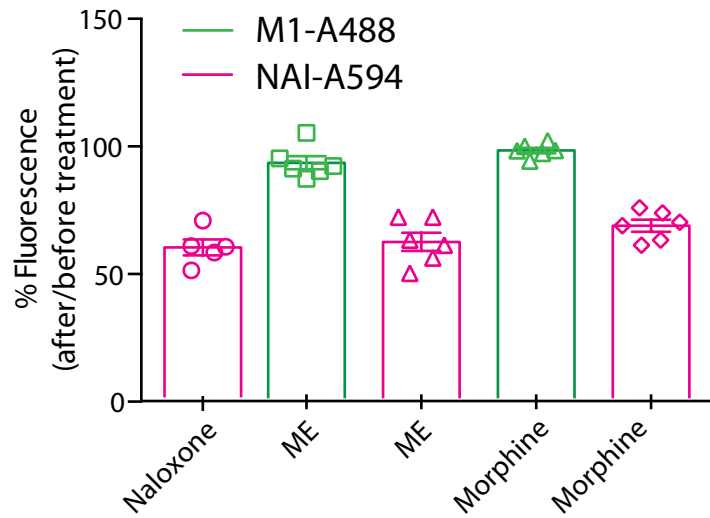

B) Concentration dependence

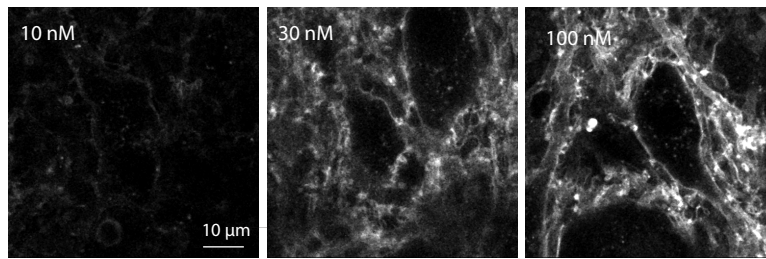

C) Time dependence

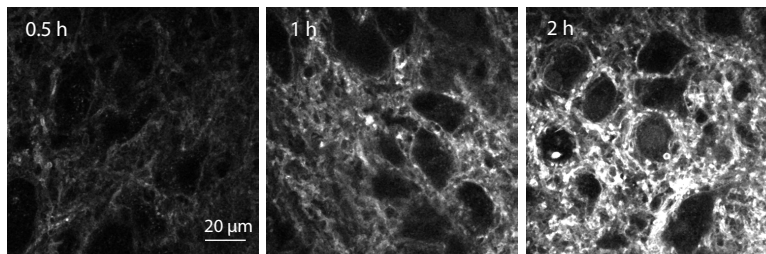

D) Labeling deep into slices

(a) NAI-A594 vs M1-A488

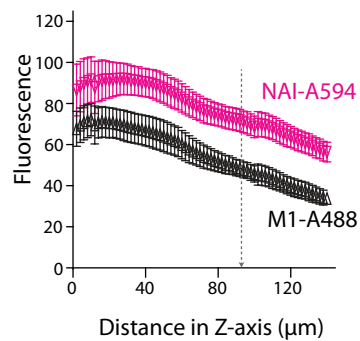

(b) NAI-A594 vs M1-A594

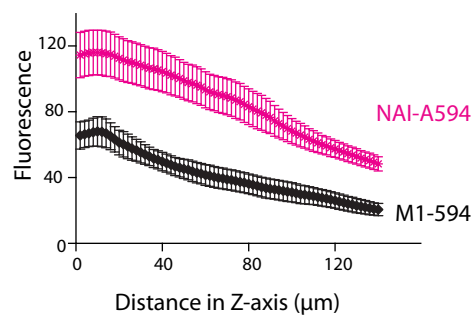

Supplement: supp [file elife-49319-supp-v1.zip › elife_poa_e49319_Figure_3_figure_supplement_1.pdf]
