# Supplementary figures and images for: Visualizing endogenous opioid receptors in living neurons using ligand-directed chemistry
Source: eLife journal article supplement (doi:10.7554/elife.49319), 2019-10-07

## Antagonism of NAI-AK

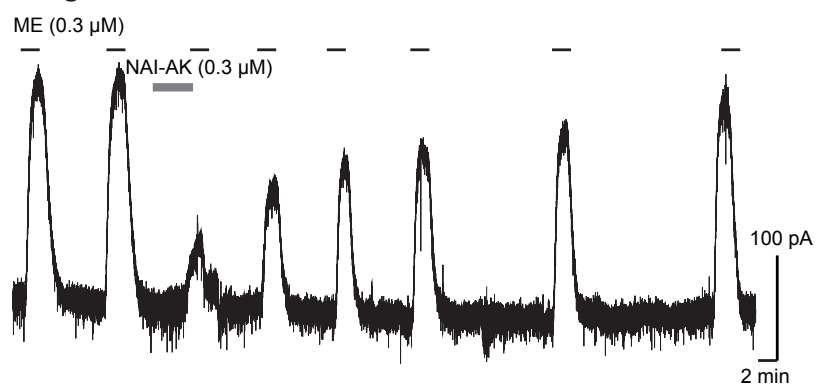

Supplement: supp [file elife-49319-supp-v1.zip]

## NAI-A594 labeled opioid receptors in brain slice

### a) Striatum

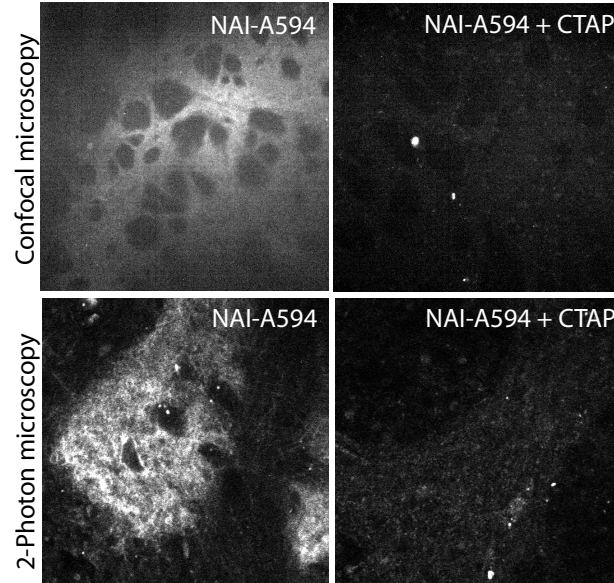

### b) Cortex

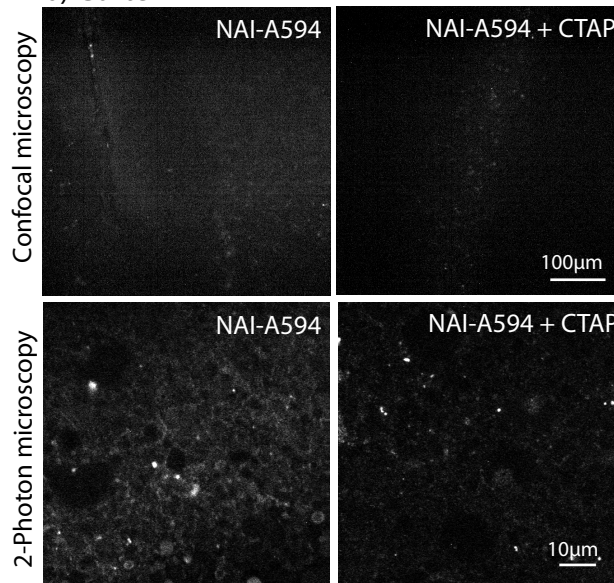

Supplement: supp [file elife-49319-supp-v1.zip › elife_poa_e49319_Figure_4_figure_supplement_1.pdf]

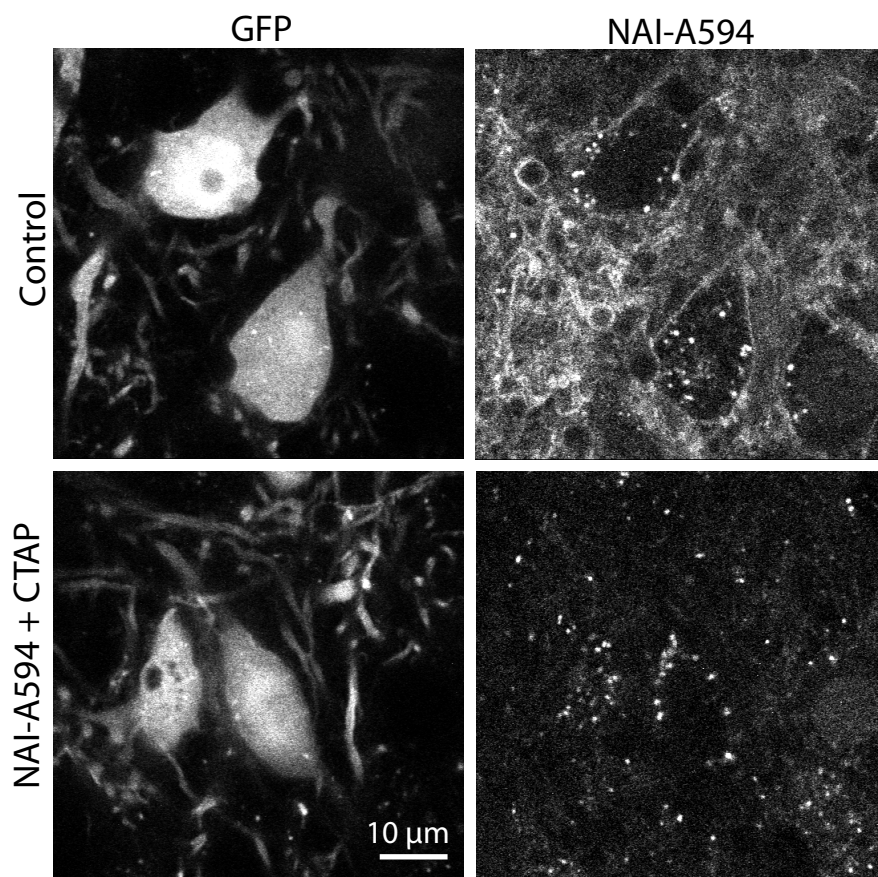

Supplement: supp [file elife-49319-supp-v1.zip › elife_poa_e49319_Figure_3_figure_supplement_2.pdf]

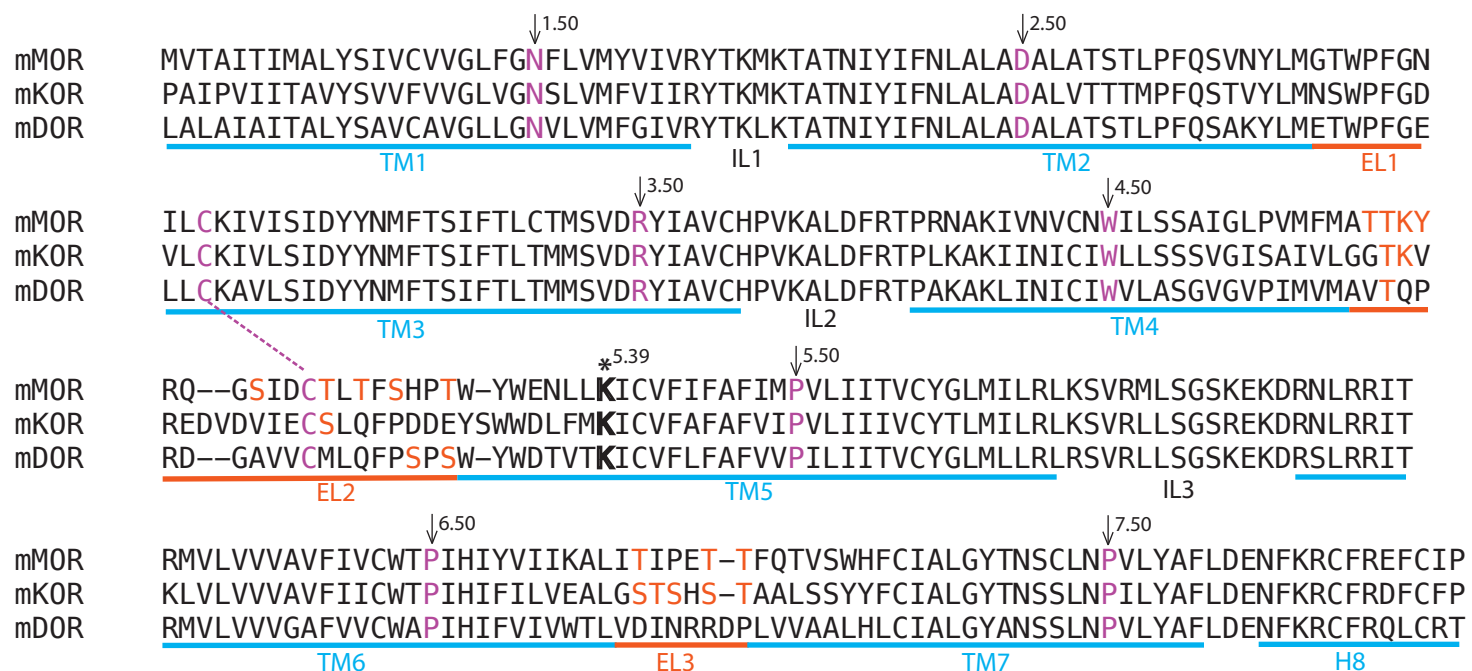

Supplement: supp [file elife-49319-supp-v1.zip › elife_poa_e49319_Figure_1_figure_supplement1.pdf]
